# Supplementary material for: Tetrakis(4-pyridylphenyl)ethylene-decorated metal–organic frameworks with aggregation induced chemiluminescence emission on paper-based paltform for volatile sulfur compounds measurement
Source: Research Square preprint supplement (doi:10.21203/rs.3.rs-7195328/v1), 2025-08-08
Supplement: Supplementary file 1 [file 7487524cbc4d55ab39ceae44.docx]

**Supporting Information**

**[Tetrakis(4-pyridylphenyl)ethylene-decorated metal–organic frameworks with aggregation induced chemiluminescence emission on paper-based paltform for volatile sulfur compounds](https://www.x-mol.com/paperRedirect/5871006" \t "_blank) measurement**

Huaqin Shui1· Yanli Guo1· Jingbo Geng1· Qing Chang1· Yuxin Tian1·

Xue Du1· Yan Jin1· Baoxin Li1· Wei Liu1 ID

*Key Laboratory of Analytical Chemistry for Life Science of Shaanxi Province,*

*School of Chemistry and Chemical Engineering, Shaanxi Normal University, Xi’an, 710062*

Huaqin Shui and Yanli Guo contributed equally to this work and they are co-first authors.

**Corresponding Author: Wei Liu -Key Laboratory of Analytical Chemistry for Life Science of Shaanxi Province, School of Chemistry and Chemical Engineering, Shaanxi Normal University, Xi’an, 710062, PR China.*

*Email: weiliusnnu@snnu.edu.cn; [weiliu@126.com](mailto:weiliu@126.com)*

**Table of Contents for Supporting Information**

[1. Fig. S1. CRET process verification of TPPE-TCPO-H](#_Toc134375273)[2](#_Toc134375273)[O](#_Toc134375273)[2](#_Toc134375273) [system 3](#_Toc134375273)

[2. Fig. S2. Optimization of H](#_Toc134375274)[2](#_Toc134375274)[S detection conditions 4](#_Toc134375274)

[3. Fig. S3. CL results of CH](#_Toc134375275)[4](#_Toc134375275)[S and C](#_Toc134375275)[2](#_Toc134375275)[H](#_Toc134375275)[6](#_Toc134375275)[S detection with Cu-TPPE@paper 4](#_Toc134375275)

[4. Fig. S4. The selectivity and repeatability of VSCs detection 5](#_Toc134375276)

[5. Table S1. Comparison of different detection methods for VSCs in human EB 6](#_Toc134375277)

[6. References 7](#_Toc134375278)

**1. Fig. S1. CRET process verification of TPPE-TCPO-H2O2 system**

**Fig. S1.** CRET process verification of TPPE-TCPO-H2O2 system. (A) CL spectrum of TCPO (5 mM)-H2O2 (0.1 M), (B) FL spectrum of TPPE solution (0.01 g/mL), (C) CL spectrum of TCPO-H2O2 and FL excitation spectrum of TPPE, (D) CL spectrum of TPPE-TCPO-H2O2 system, (E) UV-Vis absorption spectrum of TCPO, TPPE and TPPE-TCPO-H2O2.

**2. Fig. S2. Optimization of H2S detection conditions**

**Fig. S2.** Optimization of H2S detection conditions. The effects of (A) TCPO and (B) H2O2 solution concentrations, and (C) sensing time on H2S detection.

**3. Fig. S3. CL results of CH4S and C2H6S detection with Cu-TPPE@paper**

**Fig. S3.** CL results of CH4S and C2H6S detection with Cu-TPPE@paper. (A) CL signals and (B) linear relationship of 1.0-10.0 ppm CH4S (n=3), (C) CL signals and (D) linear relationship of 0.08-0.8 ppm C2H6S (n=3).

**4. Fig. S4. The selectivity and repeatability of VSCs detection**

**Fig. S4.** The selectivity and repeatability of VSCs detection. (A) Effects of interfering substances on H2S detection, (B) repeatability of H2S detection with Cu-TPPE@paper (TCPO: 5.0 mM, 2.5 *μ*L; H2O2: 0.1 M, 2.5 *μ*L).

**5. Table S1. Comparison of different detection methods for VSCs in human EB**

| **Detection method** | **Platform** | **LOD** | **Ref.** |
| --- | --- | --- | --- |
| Gas chromatography (GC) | G2800 gas chromatograph equipped with a flame photometric detector, a column packed with 1,2,3-Trispropane 25% (2-cyanoethoxy) on Chromosorb W | \ | 1 |
| Gas chromatography-  mass spectrometry (GC-MS) | Unity® thermal desorber, HP6890N gas chromatograph, HP5973 mass spectrometer | C2H6S: 0.9 ppb  dimethyl disulfide: 0.017 ppb  dimethyl trisulfide: 0.032 ppb  allyl methyl sulfide:0.029 ppb  carbon disulfide: 0.043 ppb | 2 |
| Colorimetry | HTS-Pb(Ac)2@NFs | H2S: 400 ppb | 3 |
| Colorimetry | AgNPs on a nylon membrane | H2S: 45 ppb | 4 |
| Colorimetry and chemiluminescence (CL) | Cu-TATB@paper and luminol-H2O2 system | VSCs: 0.2 *µ*M for colorimetry, 8 nM for CL | 5 |
| Electrochemistry | Au NPs-ZnO hybrid | CH4S: 50 ppb | 6 |
| Electrochemistry | ZIF-8 derived 3DIO ZnO@Au/WO3 | H2S: 50 ppb | 7 |
| Electrochemistry | Mesoporous rutile SnO2 microtube | H2S: 0.5 ppb | 8 |
| Electrochemistry | 2.1 wt% NiO/WO3 NPs | H2S: 0.05 ppm | 9 |
| AICE | Cu-TPPE@paper | H2S: 0.03 ppm  CH4S: 0.3 ppm  C2H6S: 0.03 ppm | This work |

**6. References**

1. Koshimune S, Awano S, Gohara K, Kurihara E, Ansai T, Takehara T (2003) Low Salivary Flow and Volatile Sulfur Compounds in Mouth Air. Oral Surg Oral Med Oral Pathol Oral Radiol Endod 96(1): 38-41. *https://doi.org/10.1016/S1079-2104(03)00162-8*
2. Velde SD, Quirynen M, Hee P, Steenberghe D (2007) Halitosis Associated Volatiles in Breath of Healthy Subjects. J Chromatogr B 853(1-2): 54-61. *https://doi.org/10.1016/j.jchromb.2007.02.048*
3. Cha JH, Kim DH, Choi SJ, Koo WT, Kim ID (2018) Sub-Parts-Per-Million Hydrogen Sulfide Colorimetric Sensor: Lead Acetate Anchored Nanofibers toward Halitosis Diagnosis. Anal Chem 90(15): 8769-8775. *https://doi.org/10.1021/acs.analchem.8b01273*
4. Jornet-Martínez N, Hakobyan L, Argente-García AI, Molins-Legua C, Campíns-Falcó P (2019) Nylon-Supported Plasmonic Assay Based on the Aggregation of Silver Nanoparticles: In Situ Determination of Hydrogen Sulfide-like Compounds in Breath Samples as a Proof of Concept. ACS Sens 4(8): 2164-2172. *https://doi.org/10.1021/acssensors.9b01019*
5. Hou Y, Lv CC, Liu W,Guo YL, Jin Y, Li BX, Zhang Y, Liu YC (2022) In situ synthesis of copper metal-organic framework on paper-based device for dual-mode detection of volatile sulfur compounds in exhaled breath. Sens Actuators B Chem 352: 131008. *https://doi.org/10.1016/j.snb.2021.131008*
6. Bae G, Kim MJ, Lee A, Ji S, Jang M,Yim S, Song W, Lee SS, Yoon DH, An KS (2022) Nanometric Lamination of Zinc Oxide Nanofilms with Gold Nanoparticles for Self-Perceived Periodontal Disease Sensors. Compos Part B-Eng 230: 109490. *https://doi.org/10.1016/j.compositesb.2021.109490*
7. Yang S, Sun J, Xu L, Zhou QQ, Chen XF, Zhu SD, Dong B, Lu GY, Song HW (2022) Au@ZnO Functionalized Three-Dimensional Macroporous WO3: A Application of Selective H2S Gas Sensor for Exhaled Breath Biomarker Detection. Sens Actuators B 324: 128725. *https://doi.org/10.1016/j.snb.2020.128725*
8. Song BY, Zhang M, Teng Y, Zhang XF, Deng ZP, Huo LH, Gao S (2020) Highly Selective ppb-Level H2S Sensor for Spendable Detection of Exhaled Biomarker and Pork Freshness at Low Temperature: Mesoporous SnO2 Hierarchical Architectures Derived from Waste Scallion Root. Sens Actuators B 307: 127662. *https://doi.org/10.1016/j.snb.2020.127662*
9. Feng DL, Du LL, Xing XX, Wang C, Chen J, Zhu ZY, Tian YT, Yang DC. (2021) Highly Sensitive and Selective NiO/WO3 Composite Nanoparticles in Detecting H2S Biomarker of Halitosis. ACS Sens 6(3): 733-741. *https://doi.org/10.1021/acssensors.0c01280*
